# Supplementary material for: Characteristics Associated with Ventricular Tachyarrhythmias and Their Prognostic Impact in Heart Failure with Mildly Reduced Ejection Fraction
Source: MDPI journal article supplement (doi:10.3390/jcm13092665), 2024-05-01
Supplement: s1 [file s1]

**Supplemental Table S1. Correlation of all parameters used in multivariable regression analyses within the entire study cohort.**

| <b>Spearman's <math>\rho</math></b>   | <b>Age<br/>(years)</b> | <b>BMI<br/>(kg/m<sup>2</sup>)</b> | <b>Prior<br/>congestive<br/>heart failure</b> | <b>Chronic<br/>kidney<br/>disease</b> | <b>Diabetes</b> | <b>Acute<br/>myocardial<br/>infarction</b> | <b>Atrial<br/>fibrillation</b> | <b>NYHA<br/>functional<br/>class</b> | <b>Ischemic heart<br/>disease</b> | <b>nsVT</b> | <b>sVT/VF</b> |
|---------------------------------------|------------------------|-----------------------------------|-----------------------------------------------|---------------------------------------|-----------------|--------------------------------------------|--------------------------------|--------------------------------------|-----------------------------------|-------------|---------------|
| <b>Age (years)</b>                    | -                      | -0.198                            | 0.122                                         | 0.301                                 | 0.086           | -0.108                                     | 0.305                          | 0.180                                | 0.033                             | -0.013      | -0.073        |
| <b>BMI (kg/m<sup>2</sup>)</b>         | -0.167                 | -                                 | 0.009                                         | -0.092                                | 0.052           | 0.097                                      | -0.080                         | -0.077                               | 0.164                             | 0.017       | 0.040         |
| <b>Prior congestive heart failure</b> | 0.122                  | 0.015                             | -                                             | 0.260                                 | 0.090           | -0.161                                     | 0.187                          | 0.276                                | 0.124                             | 0.007       | 0.009         |
| <b>Chronic kidney disease</b>         | 0.301                  | -0.021                            | 0.260                                         | -                                     | 0.153           | -0.139                                     | 0.151                          | 0.241                                | 0.032                             | -0.023      | -0.040        |
| <b>Diabetes</b>                       | 0.086                  | 0.236                             | 0.090                                         | 0.153                                 | -               | 0.009                                      | 0.019                          | 0.114                                | 0.109                             | -0.046      | -0.019        |
| <b>Acute myocardial infarction</b>    | -0.108                 | 0.023                             | -0.161                                        | -0.139                                | 0.009           | -                                          | -0.210                         | -0.008                               | 0.436                             | 0.058       | 0.121         |
| <b>Atrial fibrillation</b>            | 0.305                  | -0.030                            | 0.187                                         | 0.151                                 | 0.019           | -0.210                                     | -                              | 0.170                                | -0.125                            | 0.013       | -0.054        |
| <b>NYHA functional class</b>          | 0.180                  | -0.001                            | 0.276                                         | 0.241                                 | 0.114           | -0.008                                     | 0.170                          | -                                    | 0.101                             | 0.041       | 0.009         |
| <b>Ischemic heart disease</b>         | 0.033                  | 0.079                             | 0.124                                         | 0.032                                 | 0.109           | <b>0.436</b>                               | -0.125                         | 0.101                                | -                                 | 0.051       | 0.098         |
| <b>nsVT</b>                           | -0.013                 | 0.012                             | 0.007                                         | -0.023                                | -0.046          | 0.058                                      | 0.013                          | 0.041                                | 0.051                             | -           | 0.097         |
| <b>sVT/VF</b>                         | -0.073                 | 0.015                             | 0.009                                         | -0.040                                | -0.019          | 0.121                                      | -0.054                         | 0.009                                | 0.098                             | 0.097       | -             |

BMI, body mass index; nsVT, non-sustained ventricular tachycardia; NYHA, New York Heart Association; sVT, sustained ventricular tachycardia; VF, ventricular fibrillation.

**Supplemental Table S2. Collinearity diagnostics of parameters used in multivariable regression analyses (dependent variable: 30-month all-cause mortality).**

|                                | VIF   | Tolerance |
|--------------------------------|-------|-----------|
| Age (years)                    | 1.272 | 0.786     |
| BMI (kg/m <sup>2</sup> )       | 1.111 | 0.900     |
| Prior congestive heart failure | 1.196 | 0.836     |
| Chronic kidney disease         | 1.195 | 0.837     |
| Diabetes                       | 1.108 | 0.903     |
| Acute myocardial infarction    | 1.367 | 0.732     |
| Atrial fibrillation            | 1.185 | 0.844     |
| NYHA functional class          | 1.150 | 0.870     |
| Ischemic heart disease         | 1.333 | 0.750     |
| nsVT                           | 1.019 | 0.981     |
| sVT/VF                         | 1.034 | 0.967     |

BMI, body mass index; nsVT, non-sustained ventricular fibrillation; NYHA, New York Heart Association; sVT, sustained ventricular fibrillation; VF, ventricular fibrillation; VIF, variance-inflation-factor.

**Supplemental Table S3. Univariable Cox regression analyses of all parameters used in multivariable regression analyses.**

| 30-month all-cause mortality          |       |             |              |
|---------------------------------------|-------|-------------|--------------|
| Variables                             | HR    | 95% CI      | p-value      |
| <b>Age (years)</b>                    | 1.052 | 1.045-1.060 | <b>0.001</b> |
| <b>BMI (kg/m<sup>2</sup>)</b>         | 0.939 | 0.923-0.956 | <b>0.001</b> |
| <b>Prior congestive heart failure</b> | 1.546 | 1.328-1.799 | <b>0.001</b> |
| <b>Chronic kidney disease</b>         | 2.518 | 2.167-2.926 | <b>0.001</b> |
| <b>Diabetes</b>                       | 1.277 | 1.097-1.487 | <b>0.002</b> |
| <b>Acute myocardial infarction</b>    | 0.615 | 0.498-0.761 | <b>0.001</b> |
| <b>Atrial fibrillation</b>            | 1.856 | 1.597-2.158 | <b>0.001</b> |
| <b>NYHA functional class (I-IV)</b>   | 1.347 | 1.255-1.447 | <b>0.001</b> |
| <b>Ischemic heart disease</b>         | 0.786 | 0.676-0.914 | <b>0.002</b> |
| <b>nsVT</b>                           | 0.816 | 0.471-1.413 | 0.468        |
| <b>sVT/VF</b>                         | 0.933 | 0.559-1.557 | 0.791        |

BMI, body mass index; CI, confidence interval; HR, hazard ratio; nsVT, non-sustained ventricular fibrillation; NYHA, New York Heart Association; sVT, sustained ventricular fibrillation; VF, ventricular fibrillation. Level of significance p≤0.05. Bold type indicates statistical significance.
